# Supplementary figures and images for: Modeling and optimization of the pyrolysis oil production process from polypropylene for the production of aviation kerosene
Source: Research Square preprint supplement (doi:10.21203/rs.3.rs-1359911/v1), 2022-04-12

Graphycal Abstract


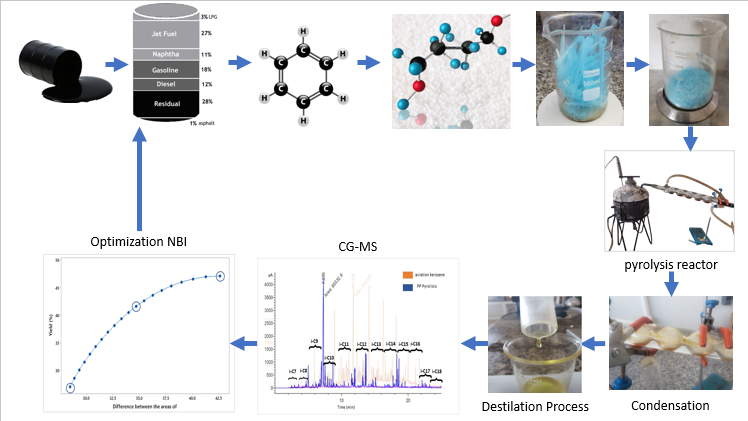

Supplement: Supplementary file 1 [file 471ef38f95fb04db8c9e3004.docx]
